# Supplementary material for: Simultaneous Production and Transportation Problem: A Case of Additive Manufacturing
Source: Atypon-hosted journal article supplement (doi:10.1287/trsc.2022.1195), 2023-01-16
Supplement: trsc.2022.1195.sm1.pdf [file trsc.2022.1195.sm1.pdf]

## Appendix A: Production Time Data

### A.1. Production Times for GR17 Instances

|      |            |            |            |            |     |     |     |     |     |     |     |     |
|------|------------|------------|------------|------------|-----|-----|-----|-----|-----|-----|-----|-----|
| Ins1 | 162<br>117 | 118<br>137 | 159<br>162 | 102<br>130 | 131 | 130 | 134 | 120 | 134 | 135 | 117 | 98  |
| Ins2 | 107<br>149 | 98<br>151  | 102<br>131 | 144<br>123 | 149 | 157 | 136 | 159 | 119 | 115 | 151 | 98  |
| Ins3 | 117<br>125 | 144<br>138 | 129<br>161 | 102<br>104 | 122 | 126 | 151 | 117 | 132 | 124 | 133 | 147 |
| Ins4 | 144<br>135 | 185<br>135 | 177<br>195 | 92<br>75   | 177 | 138 | 192 | 165 | 164 | 100 | 136 | 179 |
| Ins5 | 142<br>104 | 134<br>105 | 144<br>186 | 130<br>68  | 73  | 78  | 97  | 155 | 69  | 159 | 114 | 149 |
| Ins6 | 176<br>153 | 166<br>89  | 193<br>68  | 170<br>72  | 107 | 177 | 72  | 152 | 184 | 192 | 154 | 148 |
| Ins7 | 195<br>43  | 69<br>181  | 91<br>200  | 196<br>80  | 79  | 192 | 105 | 76  | 159 | 36  | 167 | 144 |
| Ins8 | 210<br>120 | 207<br>210 | 203<br>133 | 150<br>117 | 190 | 35  | 139 | 45  | 192 | 49  | 122 | 217 |
| Ins9 | 127<br>216 | 225<br>216 | 155<br>133 | 122<br>169 | 36  | 121 | 64  | 121 | 221 | 153 | 47  | 131 |

### A.2. Production Times for GR21 Instances

|      |            |            |            |            |            |            |            |            |     |     |     |     |
|------|------------|------------|------------|------------|------------|------------|------------|------------|-----|-----|-----|-----|
| Ins1 | 144<br>151 | 151<br>117 | 124<br>146 | 127<br>110 | 145<br>140 | 105<br>163 | 154<br>114 | 146<br>140 | 117 | 109 | 120 | 163 |
| Ins2 | 136<br>151 | 157<br>133 | 132<br>153 | 156<br>142 | 142<br>142 | 102<br>144 | 105<br>135 | 112<br>117 | 115 | 102 | 162 | 103 |
| Ins3 | 169<br>131 | 144<br>124 | 146<br>146 | 152<br>137 | 137<br>148 | 115<br>151 | 103<br>165 | 102<br>116 | 130 | 169 | 105 | 144 |
| Ins4 | 89<br>135  | 137<br>136 | 170<br>145 | 178<br>84  | 102<br>151 | 143<br>153 | 111<br>71  | 197<br>95  | 155 | 92  | 126 | 196 |
| Ins5 | 127<br>149 | 129<br>74  | 144<br>105 | 176<br>133 | 140<br>144 | 82<br>80   | 115<br>179 | 96<br>68   | 92  | 193 | 168 | 156 |
| Ins6 | 195<br>88  | 172<br>77  | 100<br>97  | 139<br>83  | 145<br>98  | 74<br>118  | 191<br>167 | 196<br>72  | 143 | 112 | 115 | 117 |
| Ins7 | 209<br>173 | 57<br>225  | 127<br>210 | 219<br>191 | 88<br>187  | 232<br>215 | 92<br>164  | 118<br>93  | 194 | 103 | 47  | 55  |

|      |           |            |            |            |            |           |            |            |     |     |     |    |
|------|-----------|------------|------------|------------|------------|-----------|------------|------------|-----|-----|-----|----|
| Ins8 | 215<br>43 | 156<br>204 | 190<br>181 | 221<br>236 | 76<br>194  | 197<br>40 | 93<br>207  | 152<br>119 | 165 | 116 | 118 | 49 |
| Ins9 | 52<br>167 | 208<br>55  | 181<br>204 | 203<br>144 | 194<br>227 | 221<br>78 | 125<br>202 | 137<br>36  | 198 | 147 | 214 | 51 |

### A.3. Production Times for GR24 Instances

|      |          |          |          |          |          |          |          |          |          |          |          |    |
|------|----------|----------|----------|----------|----------|----------|----------|----------|----------|----------|----------|----|
| Ins1 | 66<br>60 | 44<br>47 | 44<br>42 | 47<br>57 | 62<br>60 | 52<br>66 | 60<br>51 | 55<br>42 | 68<br>62 | 53<br>56 | 60<br>59 | 43 |
| Ins2 | 45<br>44 | 60<br>67 | 51<br>51 | 64<br>44 | 43<br>44 | 58<br>43 | 56<br>62 | 52<br>44 | 46<br>61 | 45<br>47 | 53<br>65 | 45 |
| Ins3 | 69<br>44 | 51<br>60 | 63<br>49 | 55<br>49 | 65<br>59 | 69<br>46 | 62<br>43 | 64<br>43 | 52<br>51 | 51<br>66 | 42<br>60 | 64 |
| Ins4 | 60<br>36 | 68<br>32 | 75<br>58 | 39<br>37 | 50<br>61 | 39<br>45 | 73<br>38 | 41<br>48 | 37<br>71 | 70<br>80 | 31<br>29 | 54 |
| Ins5 | 75<br>54 | 28<br>39 | 31<br>52 | 30<br>50 | 71<br>53 | 38<br>70 | 55<br>71 | 32<br>51 | 63<br>52 | 64<br>67 | 52<br>32 | 49 |
| Ins6 | 77<br>74 | 56<br>56 | 58<br>51 | 53<br>41 | 55<br>43 | 68<br>61 | 49<br>55 | 75<br>79 | 32<br>65 | 30<br>65 | 49<br>43 | 55 |
| Ins7 | 15<br>78 | 21<br>55 | 36<br>52 | 87<br>71 | 32<br>17 | 38<br>51 | 23<br>25 | 42<br>60 | 63<br>32 | 20<br>77 | 66<br>37 | 90 |
| Ins8 | 45<br>18 | 75<br>25 | 47<br>69 | 68<br>32 | 43<br>30 | 53<br>28 | 65<br>90 | 47<br>85 | 50<br>59 | 81<br>82 | 29<br>64 | 21 |
| Ins9 | 41<br>25 | 61<br>81 | 19<br>88 | 86<br>25 | 52<br>32 | 24<br>71 | 51<br>78 | 69<br>37 | 63<br>15 | 62<br>27 | 64<br>17 | 72 |

### A.4. Production Times for FRI26 Instances

|      |                |          |          |          |          |          |          |          |          |          |          |          |
|------|----------------|----------|----------|----------|----------|----------|----------|----------|----------|----------|----------|----------|
| Ins1 | 35<br>30<br>39 | 39<br>34 | 35<br>29 | 38<br>39 | 41<br>30 | 40<br>46 | 46<br>31 | 43<br>30 | 45<br>35 | 35<br>39 | 37<br>40 | 43<br>33 |
| Ins2 | 37<br>32<br>34 | 43<br>32 | 45<br>40 | 35<br>37 | 30<br>32 | 37<br>33 | 46<br>46 | 40<br>46 | 38<br>42 | 35<br>35 | 31<br>35 | 31<br>32 |
| Ins3 | 31<br>46<br>31 | 39<br>39 | 37<br>35 | 43<br>30 | 34<br>37 | 45<br>36 | 39<br>36 | 39<br>38 | 39<br>36 | 38<br>32 | 40<br>40 | 35<br>38 |
| Ins4 | 26<br>56<br>45 | 53<br>55 | 51<br>51 | 37<br>30 | 51<br>48 | 40<br>41 | 19<br>27 | 44<br>19 | 46<br>53 | 31<br>48 | 44<br>50 | 19<br>32 |
| Ins5 | 54<br>45<br>20 | 56<br>40 | 34<br>55 | 22<br>49 | 27<br>32 | 47<br>21 | 36<br>38 | 40<br>42 | 22<br>47 | 47<br>26 | 56<br>41 | 53<br>41 |

|      |    |    |    |    |    |    |    |    |    |    |    |    |
|------|----|----|----|----|----|----|----|----|----|----|----|----|
| Ins6 | 37 | 24 | 26 | 49 | 55 | 29 | 54 | 23 | 41 | 35 | 23 | 44 |
|      | 45 | 28 | 41 | 23 | 46 | 45 | 48 | 35 | 36 | 49 | 22 | 55 |
|      | 28 |    |    |    |    |    |    |    |    |    |    |    |
| Ins7 | 53 | 16 | 62 | 24 | 17 | 34 | 10 | 52 | 62 | 34 | 49 | 40 |
|      | 15 | 64 | 11 | 22 | 49 | 25 | 57 | 35 | 49 | 20 | 28 | 49 |
|      | 37 |    |    |    |    |    |    |    |    |    |    |    |
| Ins8 | 31 | 45 | 61 | 38 | 15 | 31 | 53 | 65 | 34 | 39 | 56 | 48 |
|      | 59 | 24 | 52 | 24 | 14 | 21 | 39 | 32 | 40 | 18 | 41 | 19 |
|      | 52 |    |    |    |    |    |    |    |    |    |    |    |
| Ins9 | 17 | 46 | 38 | 23 | 30 | 42 | 34 | 58 | 62 | 43 | 46 | 47 |
|      | 57 | 28 | 45 | 55 | 41 | 65 | 43 | 25 | 38 | 10 | 26 | 59 |
|      | 10 |    |    |    |    |    |    |    |    |    |    |    |

### A.5. Production Times for BAYS29 Instances

|      |     |     |     |     |     |     |     |     |     |     |     |     |
|------|-----|-----|-----|-----|-----|-----|-----|-----|-----|-----|-----|-----|
| Ins1 | 62  | 60  | 57  | 89  | 63  | 74  | 60  | 58  | 68  | 80  | 87  | 71  |
|      | 55  | 65  | 74  | 73  | 86  | 88  | 55  | 81  | 67  | 78  | 83  | 85  |
|      | 74  | 86  | 58  | 64  |     |     |     |     |     |     |     |     |
| Ins2 | 82  | 76  | 75  | 70  | 70  | 63  | 71  | 65  | 77  | 81  | 75  | 56  |
|      | 83  | 57  | 74  | 70  | 63  | 89  | 76  | 60  | 67  | 89  | 74  | 71  |
|      | 55  | 55  | 83  | 79  |     |     |     |     |     |     |     |     |
| Ins3 | 70  | 76  | 57  | 62  | 82  | 55  | 70  | 67  | 72  | 74  | 56  | 65  |
|      | 83  | 61  | 78  | 84  | 72  | 79  | 87  | 80  | 59  | 55  | 71  | 80  |
|      | 63  | 77  | 81  | 57  |     |     |     |     |     |     |     |     |
| Ins4 | 37  | 107 | 85  | 66  | 55  | 91  | 78  | 64  | 81  | 80  | 97  | 59  |
|      | 43  | 51  | 56  | 50  | 94  | 68  | 51  | 85  | 52  | 48  | 92  | 55  |
|      | 51  | 92  | 63  | 41  |     |     |     |     |     |     |     |     |
| Ins5 | 95  | 77  | 92  | 65  | 102 | 90  | 83  | 47  | 73  | 86  | 58  | 56  |
|      | 82  | 41  | 40  | 106 | 51  | 68  | 89  | 101 | 96  | 70  | 45  | 96  |
|      | 57  | 59  | 59  | 64  |     |     |     |     |     |     |     |     |
| Ins6 | 103 | 72  | 65  | 70  | 49  | 60  | 73  | 48  | 83  | 101 | 65  | 45  |
|      | 106 | 84  | 94  | 71  | 71  | 81  | 98  | 76  | 94  | 65  | 104 | 86  |
|      | 81  | 53  | 59  | 58  |     |     |     |     |     |     |     |     |
| Ins7 | 117 | 111 | 120 | 94  | 31  | 51  | 102 | 106 | 94  | 55  | 123 | 118 |
|      | 88  | 80  | 46  | 26  | 96  | 43  | 84  | 97  | 67  | 38  | 107 | 24  |
|      | 95  | 125 | 21  | 95  |     |     |     |     |     |     |     |     |
| Ins8 | 41  | 62  | 30  | 51  | 61  | 61  | 91  | 116 | 124 | 46  | 90  | 49  |
|      | 43  | 110 | 46  | 111 | 47  | 108 | 63  | 77  | 96  | 60  | 103 | 91  |
|      | 107 | 126 | 47  | 65  |     |     |     |     |     |     |     |     |
| Ins9 | 54  | 125 | 76  | 71  | 69  | 43  | 107 | 32  | 38  | 113 | 55  | 74  |
|      | 111 | 98  | 38  | 55  | 53  | 25  | 99  | 98  | 45  | 97  | 39  | 21  |
|      | 87  | 123 | 55  | 73  |     |     |     |     |     |     |     |     |

**A.6. Production Times for DANTZIG42 Instances**

|      |    |    |    |    |    |    |    |    |    |    |    |    |
|------|----|----|----|----|----|----|----|----|----|----|----|----|
| Ins1 | 15 | 14 | 17 | 14 | 20 | 19 | 17 | 13 | 13 | 15 | 14 | 16 |
|      | 15 | 13 | 15 | 19 | 17 | 16 | 14 | 14 | 16 | 13 | 20 | 13 |
|      | 17 | 13 | 16 | 20 | 18 | 17 | 13 | 18 | 17 | 13 | 18 | 20 |
|      | 16 | 15 | 15 | 13 | 16 |    |    |    |    |    |    |    |
| Ins2 | 20 | 18 | 15 | 16 | 20 | 16 | 14 | 16 | 16 | 17 | 17 | 17 |
|      | 19 | 13 | 16 | 18 | 13 | 16 | 20 | 16 | 18 | 14 | 16 | 16 |
|      | 13 | 15 | 17 | 17 | 16 | 13 | 16 | 15 | 19 | 19 | 19 | 18 |
|      | 17 | 20 | 14 | 14 | 18 |    |    |    |    |    |    |    |
| Ins3 | 16 | 14 | 18 | 13 | 14 | 13 | 15 | 18 | 17 | 17 | 19 | 19 |
|      | 13 | 18 | 20 | 15 | 16 | 20 | 18 | 19 | 16 | 20 | 13 | 19 |
|      | 20 | 20 | 15 | 17 | 13 | 13 | 18 | 20 | 13 | 16 | 14 | 19 |
|      | 16 | 19 | 19 | 16 | 19 |    |    |    |    |    |    |    |
| Ins4 | 12 | 15 | 23 | 9  | 14 | 10 | 19 | 24 | 24 | 9  | 13 | 16 |
|      | 23 | 13 | 17 | 21 | 21 | 10 | 24 | 11 | 18 | 9  | 11 | 23 |
|      | 13 | 23 | 15 | 14 | 20 | 9  | 24 | 11 | 9  | 14 | 12 | 9  |
|      | 15 | 22 | 9  | 17 | 21 |    |    |    |    |    |    |    |
| Ins5 | 17 | 12 | 22 | 17 | 18 | 17 | 23 | 9  | 15 | 18 | 20 | 20 |
|      | 24 | 18 | 15 | 18 | 21 | 16 | 20 | 20 | 11 | 17 | 23 | 24 |
|      | 15 | 21 | 16 | 23 | 16 | 14 | 13 | 14 | 10 | 18 | 23 | 10 |
|      | 17 | 17 | 21 | 12 | 11 |    |    |    |    |    |    |    |
| Ins6 | 10 | 17 | 15 | 16 | 24 | 10 | 12 | 16 | 9  | 11 | 23 | 9  |
|      | 11 | 21 | 20 | 23 | 19 | 17 | 22 | 12 | 20 | 18 | 18 | 14 |
|      | 9  | 24 | 13 | 9  | 24 | 9  | 17 | 15 | 19 | 21 | 17 | 9  |
|      | 14 | 15 | 22 | 21 | 24 |    |    |    |    |    |    |    |
| Ins7 | 15 | 8  | 8  | 11 | 12 | 19 | 28 | 26 | 18 | 29 | 19 | 23 |
|      | 27 | 18 | 23 | 19 | 7  | 21 | 29 | 17 | 27 | 13 | 7  | 21 |
|      | 16 | 9  | 12 | 6  | 19 | 22 | 11 | 8  | 16 | 12 | 22 | 28 |
|      | 10 | 8  | 16 | 9  | 23 |    |    |    |    |    |    |    |
| Ins8 | 22 | 14 | 13 | 13 | 26 | 25 | 24 | 21 | 11 | 27 | 20 | 23 |
|      | 16 | 26 | 27 | 23 | 12 | 13 | 25 | 11 | 29 | 28 | 12 | 12 |
|      | 29 | 24 | 23 | 8  | 10 | 20 | 21 | 12 | 13 | 18 | 9  | 24 |
|      | 13 | 27 | 17 | 12 | 25 |    |    |    |    |    |    |    |
| Ins9 | 25 | 10 | 13 | 18 | 19 | 26 | 21 | 5  | 8  | 13 | 13 | 25 |
|      | 16 | 22 | 11 | 22 | 14 | 9  | 13 | 24 | 12 | 22 | 9  | 20 |
|      | 5  | 26 | 5  | 10 | 22 | 25 | 27 | 22 | 29 | 9  | 17 | 14 |
|      | 18 | 7  | 21 | 23 | 22 |    |    |    |    |    |    |    |

**A.7. Production Times for ATT48 Instances**

|      |     |     |     |     |     |     |     |     |     |     |     |     |
|------|-----|-----|-----|-----|-----|-----|-----|-----|-----|-----|-----|-----|
| Ins1 | 193 | 286 | 274 | 209 | 194 | 237 | 255 | 259 | 287 | 261 | 238 | 190 |
|      | 215 | 228 | 197 | 285 | 193 | 282 | 267 | 248 | 203 | 224 | 195 | 230 |
|      | 230 | 278 | 174 | 183 | 244 | 199 | 242 | 189 | 249 | 228 | 259 | 186 |
|      | 249 | 199 | 240 | 229 | 198 | 230 | 269 | 180 | 230 | 228 | 253 |     |

|      |     |     |     |     |     |     |     |     |     |     |     |     |
|------|-----|-----|-----|-----|-----|-----|-----|-----|-----|-----|-----|-----|
| Ins2 | 209 | 266 | 184 | 286 | 224 | 216 | 282 | 251 | 215 | 243 | 215 | 185 |
|      | 233 | 210 | 230 | 266 | 278 | 231 | 213 | 179 | 201 | 276 | 260 | 267 |
|      | 178 | 226 | 280 | 219 | 235 | 276 | 198 | 287 | 180 | 228 | 268 | 205 |
|      | 261 | 236 | 276 | 258 | 182 | 177 | 175 | 204 | 235 | 234 | 174 |     |
| Ins3 | 201 | 189 | 176 | 246 | 233 | 256 | 235 | 237 | 187 | 249 | 276 | 196 |
|      | 279 | 195 | 229 | 221 | 196 | 286 | 287 | 214 | 260 | 254 | 203 | 199 |
|      | 246 | 203 | 276 | 272 | 175 | 197 | 273 | 252 | 201 | 238 | 184 | 242 |
|      | 201 | 210 | 211 | 286 | 184 | 215 | 184 | 183 | 178 | 282 | 253 |     |
| Ins4 | 133 | 216 | 196 | 253 | 325 | 170 | 298 | 125 | 116 | 337 | 226 | 136 |
|      | 248 | 279 | 125 | 251 | 300 | 118 | 190 | 208 | 124 | 134 | 326 | 217 |
|      | 212 | 338 | 160 | 263 | 337 | 217 | 278 | 230 | 331 | 221 | 189 | 172 |
|      | 127 | 131 | 292 | 145 | 178 | 304 | 247 | 137 | 242 | 232 | 324 |     |
| Ins5 | 251 | 283 | 241 | 118 | 218 | 279 | 325 | 221 | 209 | 131 | 204 | 283 |
|      | 329 | 329 | 339 | 246 | 168 | 195 | 215 | 289 | 287 | 342 | 230 | 174 |
|      | 232 | 296 | 305 | 300 | 345 | 301 | 302 | 291 | 279 | 331 | 158 | 333 |
|      | 263 | 189 | 203 | 190 | 309 | 283 | 235 | 180 | 239 | 127 | 259 |     |
| Ins6 | 154 | 327 | 230 | 164 | 254 | 177 | 223 | 201 | 249 | 319 | 160 | 169 |
|      | 233 | 224 | 291 | 298 | 233 | 180 | 156 | 333 | 240 | 191 | 211 | 239 |
|      | 196 | 169 | 148 | 193 | 329 | 200 | 312 | 181 | 298 | 219 | 260 | 341 |
|      | 334 | 163 | 258 | 176 | 299 | 230 | 200 | 300 | 118 | 256 | 304 |     |
| Ins7 | 285 | 282 | 171 | 288 | 207 | 67  | 341 | 256 | 214 | 265 | 311 | 345 |
|      | 189 | 236 | 96  | 166 | 302 | 159 | 158 | 344 | 121 | 340 | 394 | 165 |
|      | 78  | 112 | 256 | 202 | 166 | 177 | 261 | 160 | 132 | 305 | 258 | 174 |
|      | 131 | 255 | 117 | 61  | 80  | 203 | 318 | 292 | 155 | 359 | 179 |     |
| Ins8 | 160 | 353 | 208 | 339 | 354 | 221 | 312 | 198 | 227 | 355 | 201 | 275 |
|      | 275 | 388 | 235 | 394 | 149 | 217 | 194 | 275 | 80  | 385 | 398 | 278 |
|      | 401 | 399 | 203 | 395 | 183 | 152 | 124 | 376 | 148 | 348 | 148 | 179 |
|      | 142 | 59  | 113 | 124 | 95  | 242 | 225 | 394 | 205 | 198 | 384 |     |
| Ins9 | 266 | 333 | 348 | 170 | 302 | 70  | 352 | 137 | 304 | 270 | 189 | 382 |
|      | 314 | 319 | 249 | 212 | 220 | 343 | 382 | 72  | 250 | 108 | 270 | 166 |
|      | 337 | 88  | 211 | 363 | 158 | 171 | 233 | 65  | 350 | 357 | 344 | 241 |
|      | 236 | 118 | 153 | 187 | 310 | 193 | 167 | 234 | 82  | 177 | 245 |     |

#### A.8. Production Times for GR48 Instances

|      |     |     |     |     |     |     |     |     |     |     |     |     |
|------|-----|-----|-----|-----|-----|-----|-----|-----|-----|-----|-----|-----|
| Ins1 | 130 | 81  | 133 | 128 | 130 | 109 | 100 | 109 | 102 | 114 | 119 | 111 |
|      | 95  | 105 | 110 | 94  | 114 | 134 | 116 | 100 | 98  | 125 | 132 | 119 |
|      | 127 | 114 | 104 | 95  | 102 | 126 | 118 | 116 | 127 | 96  | 128 | 121 |
|      | 109 | 111 | 115 | 108 | 98  | 96  | 98  | 105 | 82  | 86  | 131 |     |
| Ins2 | 93  | 103 | 126 | 101 | 131 | 126 | 133 | 83  | 129 | 124 | 126 | 92  |
|      | 81  | 115 | 100 | 82  | 89  | 104 | 117 | 88  | 110 | 101 | 97  | 101 |
|      | 106 | 90  | 121 | 109 | 94  | 103 | 132 | 85  | 101 | 124 | 119 | 91  |
|      | 123 | 104 | 101 | 84  | 90  | 84  | 119 | 98  | 91  | 128 | 118 |     |

|      |     |     |     |     |     |     |     |     |     |     |     |     |
|------|-----|-----|-----|-----|-----|-----|-----|-----|-----|-----|-----|-----|
| Ins3 | 101 | 122 | 92  | 104 | 89  | 110 | 104 | 133 | 81  | 128 | 82  | 102 |
|      | 118 | 121 | 104 | 120 | 101 | 92  | 95  | 116 | 132 | 103 | 128 | 110 |
|      | 119 | 111 | 92  | 131 | 111 | 83  | 96  | 129 | 115 | 119 | 123 | 107 |
|      | 101 | 100 | 129 | 109 | 114 | 102 | 131 | 116 | 125 | 109 | 131 |     |
| Ins4 | 151 | 73  | 154 | 82  | 98  | 57  | 140 | 149 | 144 | 138 | 104 | 103 |
|      | 121 | 161 | 67  | 67  | 117 | 129 | 119 | 157 | 97  | 157 | 93  | 137 |
|      | 125 | 56  | 107 | 104 | 137 | 144 | 140 | 140 | 61  | 55  | 88  | 126 |
|      | 109 | 55  | 81  | 97  | 148 | 115 | 123 | 75  | 84  | 126 | 148 |     |
| Ins5 | 143 | 105 | 84  | 135 | 105 | 84  | 103 | 61  | 158 | 143 | 92  | 139 |
|      | 69  | 64  | 104 | 151 | 82  | 149 | 87  | 58  | 154 | 65  | 104 | 158 |
|      | 70  | 68  | 131 | 74  | 140 | 160 | 130 | 117 | 70  | 156 | 138 | 152 |
|      | 145 | 82  | 160 | 159 | 62  | 55  | 149 | 69  | 79  | 120 | 55  |     |
| Ins6 | 78  | 71  | 54  | 112 | 117 | 72  | 142 | 61  | 122 | 152 | 109 | 90  |
|      | 132 | 56  | 134 | 72  | 151 | 149 | 66  | 75  | 86  | 94  | 135 | 160 |
|      | 105 | 81  | 134 | 95  | 64  | 68  | 80  | 77  | 142 | 111 | 139 | 92  |
|      | 90  | 98  | 126 | 126 | 61  | 157 | 132 | 140 | 86  | 124 | 94  |     |
| Ins7 | 171 | 76  | 108 | 60  | 173 | 31  | 90  | 87  | 57  | 46  | 170 | 170 |
|      | 169 | 146 | 130 | 107 | 84  | 166 | 37  | 44  | 179 | 159 | 78  | 69  |
|      | 28  | 173 | 164 | 107 | 70  | 88  | 65  | 146 | 39  | 175 | 45  | 76  |
|      | 103 | 125 | 37  | 129 | 133 | 75  | 141 | 103 | 167 | 135 | 106 |     |
| Ins8 | 149 | 127 | 179 | 116 | 132 | 68  | 145 | 164 | 130 | 98  | 136 | 163 |
|      | 112 | 50  | 133 | 134 | 153 | 177 | 105 | 79  | 74  | 104 | 30  | 71  |
|      | 157 | 34  | 99  | 91  | 54  | 148 | 31  | 27  | 63  | 175 | 142 | 179 |
|      | 143 | 88  | 53  | 91  | 116 | 112 | 144 | 59  | 187 | 54  | 34  |     |
| Ins9 | 154 | 41  | 137 | 129 | 96  | 170 | 128 | 76  | 175 | 161 | 178 | 102 |
|      | 157 | 172 | 129 | 68  | 151 | 27  | 173 | 179 | 145 | 101 | 60  | 91  |
|      | 103 | 73  | 49  | 114 | 183 | 171 | 94  | 96  | 93  | 64  | 127 | 146 |
|      | 175 | 80  | 106 | 178 | 61  | 59  | 33  | 85  | 142 | 113 | 165 |     |

#### A.9. Production Times for HK48 Instances

|      |     |     |     |     |     |     |     |     |     |     |     |     |
|------|-----|-----|-----|-----|-----|-----|-----|-----|-----|-----|-----|-----|
| Ins1 | 294 | 203 | 216 | 223 | 302 | 185 | 199 | 261 | 189 | 217 | 293 | 217 |
|      | 228 | 227 | 245 | 268 | 201 | 277 | 250 | 213 | 237 | 277 | 207 | 185 |
|      | 212 | 239 | 211 | 246 | 231 | 220 | 274 | 240 | 240 | 223 | 265 | 271 |
|      | 225 | 299 | 291 | 199 | 213 | 235 | 235 | 262 | 237 | 191 | 213 |     |
| Ins2 | 281 | 243 | 193 | 265 | 272 | 248 | 228 | 263 | 268 | 232 | 269 | 278 |
|      | 199 | 281 | 210 | 268 | 271 | 240 | 185 | 187 | 208 | 213 | 237 | 288 |
|      | 266 | 233 | 218 | 217 | 251 | 273 | 233 | 212 | 233 | 230 | 282 | 289 |
|      | 281 | 262 | 272 | 238 | 292 | 229 | 277 | 244 | 235 | 198 | 227 |     |
| Ins3 | 187 | 251 | 241 | 187 | 207 | 284 | 280 | 293 | 258 | 207 | 256 | 285 |
|      | 190 | 221 | 287 | 267 | 196 | 186 | 183 | 282 | 192 | 197 | 218 | 290 |
|      | 218 | 219 | 252 | 189 | 186 | 300 | 219 | 304 | 207 | 256 | 202 | 300 |
|      | 198 | 276 | 304 | 193 | 281 | 219 | 274 | 212 | 240 | 251 | 258 |     |

|      |     |     |     |     |     |     |     |     |     |     |     |     |
|------|-----|-----|-----|-----|-----|-----|-----|-----|-----|-----|-----|-----|
| Ins4 | 250 | 330 | 127 | 271 | 341 | 207 | 238 | 202 | 265 | 334 | 328 | 143 |
|      | 258 | 205 | 244 | 352 | 271 | 250 | 292 | 341 | 311 | 347 | 245 | 237 |
|      | 314 | 243 | 347 | 149 | 223 | 303 | 124 | 278 | 182 | 195 | 259 | 172 |
|      | 334 | 177 | 198 | 320 | 274 | 173 | 247 | 284 | 182 | 293 | 150 |     |
| Ins5 | 264 | 282 | 365 | 332 | 209 | 267 | 345 | 122 | 250 | 191 | 226 | 188 |
|      | 201 | 194 | 294 | 347 | 151 | 141 | 140 | 261 | 295 | 286 | 189 | 218 |
|      | 129 | 206 | 166 | 317 | 178 | 122 | 278 | 202 | 218 | 278 | 350 | 317 |
|      | 164 | 316 | 320 | 317 | 174 | 229 | 338 | 326 | 276 | 246 | 248 |     |
| Ins6 | 141 | 163 | 188 | 125 | 363 | 203 | 176 | 350 | 152 | 365 | 298 | 317 |
|      | 231 | 266 | 354 | 130 | 340 | 253 | 163 | 130 | 169 | 169 | 145 | 329 |
|      | 230 | 154 | 213 | 201 | 344 | 217 | 232 | 362 | 269 | 205 | 279 | 283 |
|      | 188 | 278 | 244 | 288 | 295 | 136 | 218 | 283 | 225 | 187 | 288 |     |
| Ins7 | 363 | 266 | 279 | 130 | 138 | 372 | 339 | 127 | 278 | 303 | 106 | 115 |
|      | 125 | 327 | 139 | 146 | 301 | 267 | 369 | 304 | 190 | 119 | 367 | 259 |
|      | 90  | 200 | 61  | 413 | 289 | 345 | 178 | 336 | 257 | 398 | 252 | 128 |
|      | 155 | 167 | 192 | 149 | 409 | 115 | 238 | 372 | 73  | 189 | 222 |     |
| Ins8 | 261 | 396 | 250 | 401 | 195 | 373 | 268 | 266 | 80  | 269 | 154 | 237 |
|      | 314 | 112 | 143 | 319 | 195 | 284 | 160 | 419 | 335 | 174 | 298 | 298 |
|      | 143 | 232 | 237 | 209 | 384 | 166 | 362 | 118 | 260 | 148 | 366 | 357 |
|      | 122 | 282 | 207 | 88  | 234 | 226 | 316 | 418 | 303 | 411 | 96  |     |
| Ins9 | 117 | 239 | 143 | 175 | 409 | 82  | 234 | 352 | 182 | 205 | 400 | 392 |
|      | 285 | 426 | 123 | 341 | 225 | 110 | 73  | 215 | 190 | 200 | 302 | 210 |
|      | 360 | 390 | 272 | 271 | 330 | 143 | 286 | 266 | 361 | 330 | 224 | 336 |
|      | 141 | 246 | 315 | 376 | 339 | 334 | 241 | 310 | 138 | 82  | 162 |     |

## Appendix B: Detailed Results for Heuristic Approach

The tables below provide the results for the nine SPTP instances derived from DANTZIG42, ATT48, GR48, and HK48 respectively. In these tables, column “Inst” provides the instance number, column “BI” provides the objective value of the best integer solution (upper bound) reported by CPLEX and column “H.sol” shows the objective value (upper bound) obtained using the proposed heuristic. The values marked with asterisks (\*) in column “BI” indicate optimal solutions i.e., the optimality of these values was proven within the one-hour time limit. Note that for instances 3 and 7 in Table B.3, our heuristic has obtained a better bound than the best bound obtained from CPLEX within the prescribed time limit and which is why the percentage gap is showing negative.

**Table B.1:** Heuristic Results for SPTP instances based on DANTZIG42

| Inst    | BI   | k = 1000 |      |       | k = 2000 |      |       | k = 5000 |      |       |
|---------|------|----------|------|-------|----------|------|-------|----------|------|-------|
|         |      | H.sol    | %age | Time  | H.sol    | %age | Time  | H.sol    | %age | Time  |
| 1       | 713* | 717      | 0.56 | 0.112 | 713      | 0.00 | 0.105 | 713      | 0.00 | 0.216 |
| 2       | 714* | 717      | 0.42 | 0.060 | 717      | 0.42 | 0.101 | 714      | 0.00 | 0.170 |
| 3       | 704* | 722      | 2.56 | 0.058 | 704      | 0.00 | 0.084 | 704      | 0.00 | 0.162 |
| 4       | 712* | 727      | 2.11 | 0.058 | 727      | 2.11 | 0.082 | 717      | 0.70 | 0.209 |
| 5       | 717* | 724      | 0.98 | 0.054 | 724      | 0.98 | 0.100 | 724      | 0.98 | 0.194 |
| 6       | 704* | 713      | 1.28 | 0.052 | 713      | 1.28 | 0.118 | 709      | 0.71 | 0.162 |
| 7       | 719* | 719      | 0.00 | 0.058 | 719      | 0.00 | 0.110 | 719      | 0.00 | 0.155 |
| 8       | 781* | 781      | 0.00 | 0.061 | 781      | 0.00 | 0.089 | 781      | 0.00 | 0.139 |
| 9       | 711* | 729      | 2.53 | 0.056 | 722      | 1.55 | 0.093 | 713      | 0.28 | 0.162 |
| Average |      |          | 1.16 | 0.063 |          | 0.70 | 0.098 |          | 0.30 | 0.174 |

**Table B.2:** Heuristic Results for SPTP instances based on ATT48

| Inst    | BI     | k = 1000 |      |       | k = 2000 |      |       | k = 5000 |      |       |
|---------|--------|----------|------|-------|----------|------|-------|----------|------|-------|
|         |        | H.sol    | %age | Time  | H.sol    | %age | Time  | H.sol    | %age | Time  |
| 1       | 10963* | 10981    | 0.16 | 0.105 | 10963    | 0.00 | 0.153 | 10963    | 0.00 | 0.265 |
| 2       | 10959* | 10990    | 0.28 | 0.101 | 10990    | 0.28 | 0.149 | 10966    | 0.06 | 0.240 |
| 3       | 10797* | 10828    | 0.29 | 0.098 | 10828    | 0.29 | 0.149 | 10828    | 0.29 | 0.296 |
| 4       | 10689* | 10866    | 1.66 | 0.096 | 10820    | 1.23 | 0.148 | 10721    | 0.30 | 0.286 |
| 5       | 12003* | 12003    | 0.00 | 0.075 | 12003    | 0.00 | 0.115 | 12003    | 0.00 | 0.179 |
| 6       | 11087* | 11087    | 0.00 | 0.095 | 11087    | 0.00 | 0.163 | 11087    | 0.00 | 0.232 |
| 7       | 10658* | 10852    | 1.82 | 0.107 | 10807    | 1.40 | 0.174 | 10807    | 1.40 | 0.235 |
| 8       | 11886  | 11886    | 0.00 | 0.076 | 11886    | 0.00 | 0.110 | 11886    | 0.00 | 0.170 |
| 9       | 11226* | 11226    | 0.00 | 0.089 | 11226    | 0.00 | 0.133 | 11226    | 0.00 | 0.207 |
| Average |        |          | 0.47 | 0.094 |          | 0.35 | 0.144 |          | 0.23 | 0.234 |

**Table B.3:** Heuristic Results for SPTP instances based on GR48

| Inst | BI    | k = 1000 |      |       | k = 2000 |       |       | k = 5000 |       |       |
|------|-------|----------|------|-------|----------|-------|-------|----------|-------|-------|
|      |       | H.sol    | %age | Time  | H.sol    | %age  | Time  | H.sol    | %age  | Time  |
| 1    | 5291* | 5301     | 0.19 | 0.097 | 5301     | 0.19  | 0.152 | 5301     | 0.19  | 0.294 |
| 2    | 5142  | 5201     | 1.15 | 0.103 | 5185     | 0.84  | 0.144 | 5185     | 0.84  | 0.189 |
| 3    | 5271  | 5334     | 1.20 | 0.095 | 5268     | -0.06 | 0.161 | 5268     | -0.06 | 0.172 |
| 4    | 5329* | 5329     | 0.00 | 0.100 | 5329     | 0.00  | 0.150 | 5329     | 0.00  | 0.246 |
| 5    | 5250  | 5298     | 0.91 | 0.103 | 5298     | 0.91  | 0.148 | 5298     | 0.91  | 0.167 |

|         |       |      |       |       |      |       |       |      |       |       |
|---------|-------|------|-------|-------|------|-------|-------|------|-------|-------|
| 6       | 5148  | 5269 | 2.35  | 0.095 | 5235 | 1.69  | 0.155 | 5201 | 1.03  | 0.133 |
| 7       | 5203  | 5192 | -0.21 | 0.100 | 5192 | -0.21 | 0.144 | 5192 | -0.21 | 0.245 |
| 8       | 5190  | 5190 | 0.00  | 0.093 | 5190 | 0.00  | 0.149 | 5190 | 0.00  | 0.136 |
| 9       | 5580* | 5580 | 0.00  | 0.095 | 5580 | 0.00  | 0.122 | 5580 | 0.00  | 0.136 |
| Average |       |      | 0.62  | 0.098 |      | 0.37  | 0.147 |      | 0.30  | 0.191 |

**Table B.4:** Heuristic Results for SPTP instances based on HK48

| Inst    | BI     | k = 1000 |      |       | k = 2000 |      |       | k = 5000 |      |       |
|---------|--------|----------|------|-------|----------|------|-------|----------|------|-------|
|         |        | H.sol    | %age | Time  | H.sol    | %age | Time  | H.sol    | %age | Time  |
| 1       | 11640* | 11881    | 2.07 | 0.085 | 11794    | 1.32 | 0.130 | 11657    | 0.15 | 0.239 |
| 2       | 11845* | 12021    | 1.49 | 0.093 | 11946    | 0.85 | 0.128 | 11946    | 0.85 | 0.216 |
| 3       | 11664* | 11812    | 1.27 | 0.076 | 11746    | 0.70 | 0.117 | 11746    | 0.70 | 0.220 |
| 4       | 12144* | 12335    | 1.57 | 0.081 | 12225    | 0.67 | 0.114 | 12225    | 0.67 | 0.227 |
| 5       | 11817* | 12016    | 1.68 | 0.082 | 11976    | 1.35 | 0.115 | 11976    | 1.35 | 0.225 |
| 6       | 11688* | 11857    | 1.45 | 0.082 | 11857    | 1.45 | 0.125 | 11857    | 1.45 | 0.205 |
| 7       | 11583* | 11717    | 1.16 | 0.087 | 11717    | 1.16 | 0.132 | 11717    | 1.16 | 0.189 |
| 8       | 12334  | 12390    | 0.45 | 0.070 | 12390    | 0.45 | 0.104 | 12342    | 0.06 | 0.180 |
| 9       | 12373  | 12373    | 0.00 | 0.079 | 12373    | 0.00 | 0.115 | 12373    | 0.00 | 0.187 |
| Average |        |          | 1.24 | 0.082 |          | 0.88 | 0.120 |          | 0.71 | 0.210 |

### Appendix C: Data Set for Tardiness Case

n = 10

di = 235 212 168 292 79 237 155 117 421 237

Pi = 15 14 17 14 20 19 17 13 13 15

T =

|     |     |    |    |    |    |    |    |    |    |     |
|-----|-----|----|----|----|----|----|----|----|----|-----|
| 0   | 8   | 39 | 37 | 50 | 61 | 58 | 59 | 62 | 81 | 103 |
| 8   | 0   | 45 | 47 | 49 | 62 | 60 | 60 | 66 | 81 | 107 |
| 39  | 45  | 0  | 9  | 21 | 21 | 16 | 15 | 20 | 40 | 62  |
| 37  | 47  | 9  | 0  | 15 | 20 | 17 | 20 | 25 | 44 | 67  |
| 50  | 49  | 21 | 15 | 0  | 17 | 18 | 26 | 31 | 50 | 72  |
| 61  | 62  | 21 | 20 | 17 | 0  | 6  | 17 | 22 | 41 | 63  |
| 58  | 60  | 16 | 17 | 18 | 6  | 0  | 10 | 15 | 35 | 57  |
| 59  | 60  | 15 | 20 | 26 | 17 | 10 | 0  | 5  | 24 | 46  |
| 62  | 66  | 20 | 25 | 31 | 22 | 15 | 5  | 0  | 20 | 41  |
| 81  | 81  | 40 | 44 | 50 | 41 | 35 | 24 | 20 | 0  | 23  |
| 103 | 107 | 62 | 67 | 72 | 63 | 57 | 46 | 41 | 23 | 0   |
